# Supplementary material for: Plasmonic MoO2 embedded MoNi4 nanosheets prepared by NiMoO4 transformation for visible-light-enhanced 4-nitrophenol reduction
Source: Royal Society of Chemistry journal article supplement (doi:10.1039/d1dt03216j), 2021-01-01
Supplement: d1dt03216j1.pdf [file d1dt03216j1.pdf]

# Plasmonic MoO<sub>2</sub> embedded MoNi<sub>4</sub> nanosheets prepared by NiMoO<sub>4</sub> transformation for visible-light-enhanced 4-nitrophenol reduction

LiuJun Deng,<sup>a,b</sup> Yu Zou<sup>\*a,b</sup> and Jiang Jiang<sup>\*a,b</sup>

<sup>a</sup> School of Nano-Tech and Nano-Bionics, University of Science and Technology of China, Hefei 230026, China.

<sup>b</sup> i-Lab, CAS Key Laboratory of Nano-Bio Interface, CAS Center for Excellence in Nanoscience, Suzhou Institute of Nano-Tech and Nano-Bionics, Chinese Academy of Sciences, Suzhou 215123, China.

E-mail: yzou2012@sinano.ac.cn; jjiang2010@sinano.ac.cn

Supporting information:

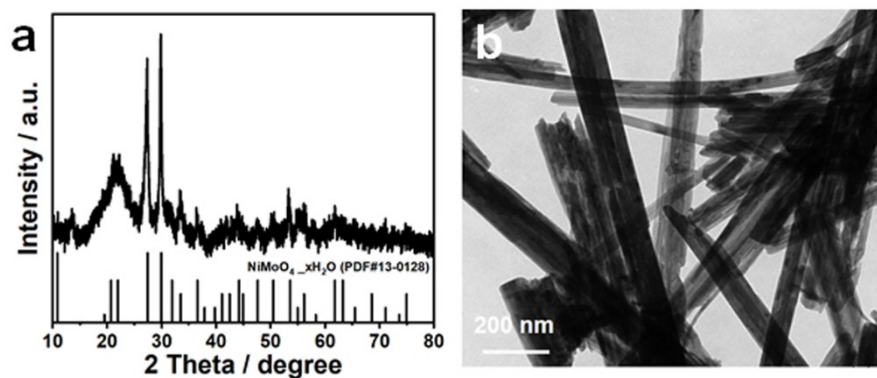

**Fig. S1** (a) XRD pattern and (b) TEM image of the as-synthesized NiMoO<sub>4</sub> precursor by the hydrothermal reaction between Ni(NO<sub>3</sub>)<sub>2</sub> and Na<sub>2</sub>MoO<sub>4</sub>.

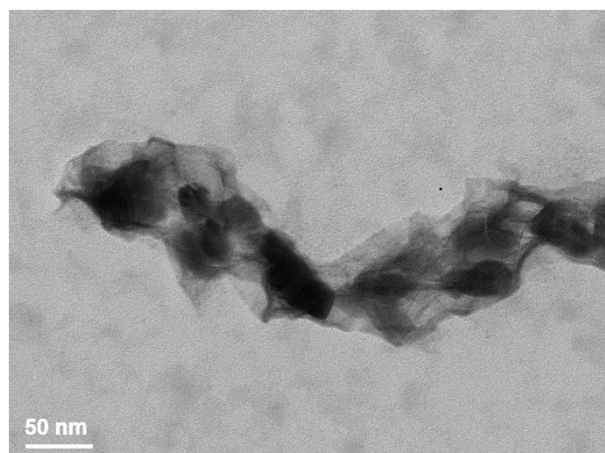

**Fig. S2** TEM image of MoNi<sub>4</sub>-MoO<sub>2</sub> hybrid catalysts.

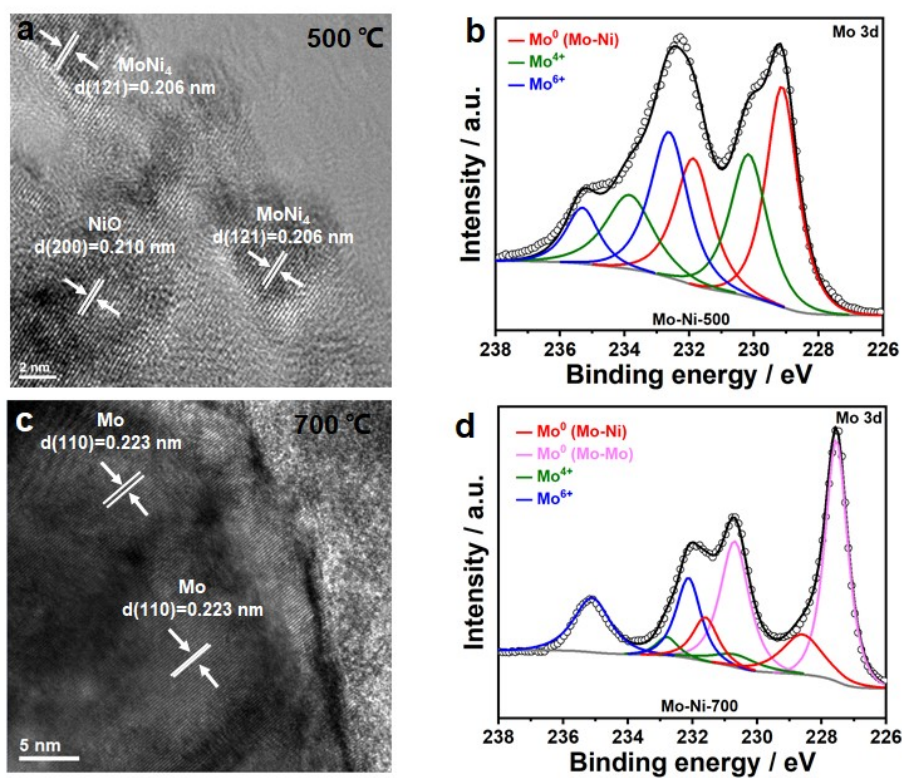

**Fig. S3** HRTEM images and Mo 3d XPS spectra of the products of NiMoO<sub>4</sub> reduction transformation at 500 °C (a, b) and 700 °C (c, d).

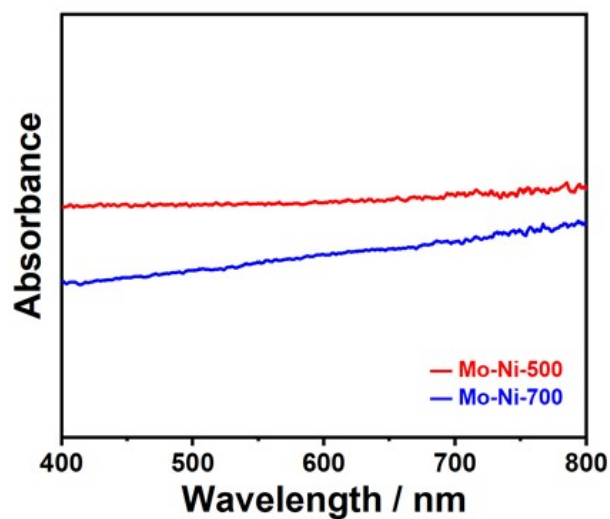

**Fig. S4** Visible absorption spectra of the products of  $\text{NiMoO}_4$  reduction transformation at 500 °C and 700 °C.

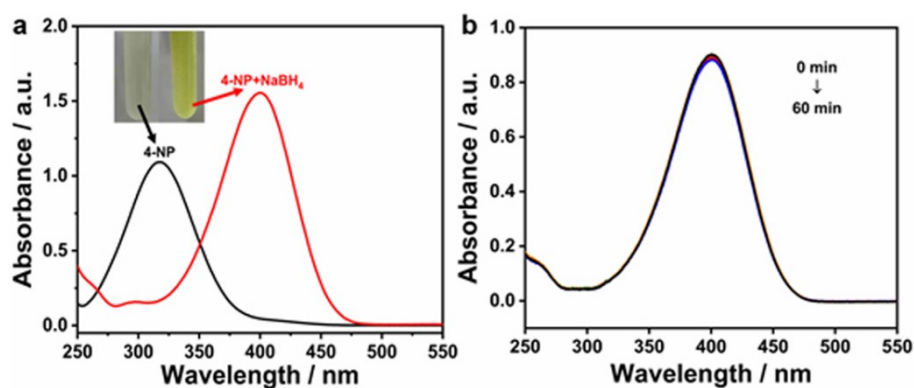

**Fig. S5** UV-vis absorption spectra of (a) aqueous solution of p-nitrophenol, and upon adding excess  $\text{NaBH}_4$ . (b) Temporal evolution of the UV-vis absorption spectra of p-nitrophenol and  $\text{NaBH}_4$  mixture in the absence of catalyst.

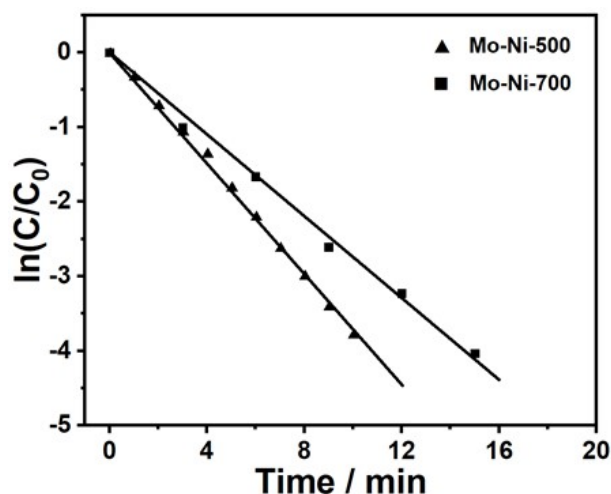

**Fig. S6** Plots of  $\ln(C/C_0)$  versus time for the reduction of 4-NP by  $\text{NaBH}_4$  with the products of  $\text{NiMoO}_4$  reduction transformation at 500 °C and 700 °C as catalysts in the dark.

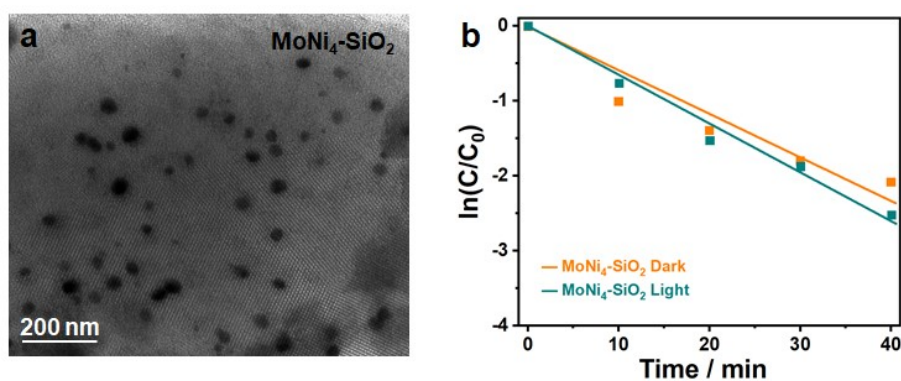

**Fig. S7** (a) TEM image of  $\text{MoNi}_4\text{-SiO}_2$  catalyst. (b) Plot of  $\ln(C/C_0)$  versus time for the reduction of 4-NP into 4-AP by  $\text{NaBH}_4$  with this catalyst.

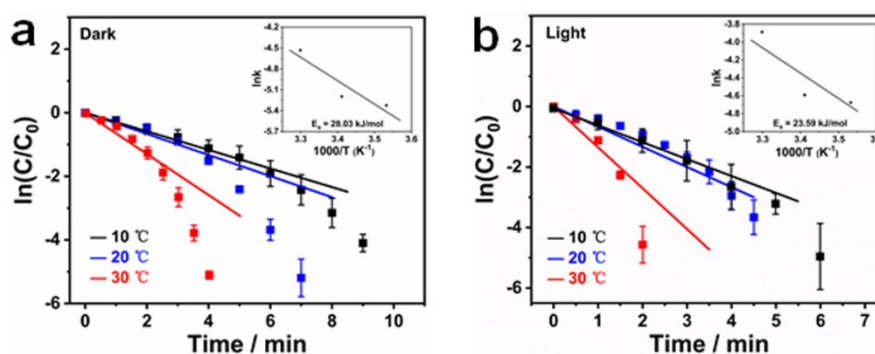

**Fig. S8** (a) Plots of  $\ln(C/C_0)$  vs. time for the conversion of 4-NP (0.9 mM) to 4-AP catalyzed by  $\text{MoNi}_4\text{-MoO}_2$  (2.5 mg) under dark (a) and light irradiation conditions (b) at different temperatures (10 °C, 20 °C, and 30 °C) with  $\text{NaBH}_4$  (25 mM) in large excess. Arrhenius plots or activation energy calculations are shown as the inset. Each data points are average over three parallel experiments.

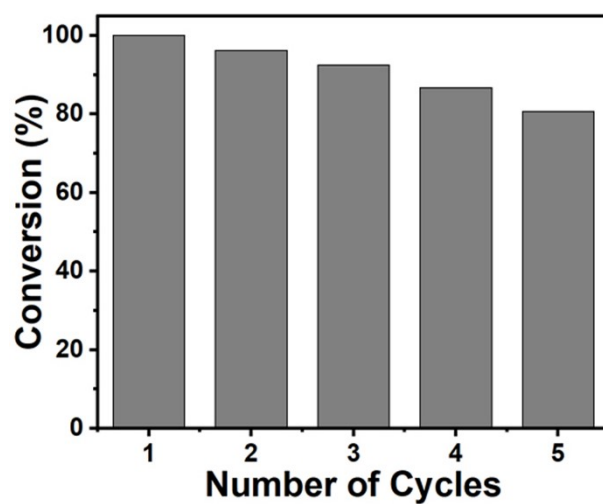

**Fig.S9** The reusability of the MoNi<sub>4</sub>-MoO<sub>2</sub> hybrid catalyst for the catalytic reduction of 4-NP under visible light irradiation condition.
